# Supplementary material for: The Impact of Mass Drug Administration on Lymphatic Filariasis
Source: Hindawi journal article supplement (doi:10.1155/2022/7504871), 2022-12-28
Supplement: f1 [file 7504871.f1.zip]

Archive with 2 entries (2 files):
- Supplemental Table S1, I.F. Aboagye.docx
- Text S1, Review protocol (1).doc
