# Supplementary figures and images for: The Impact of Mass Drug Administration on Lymphatic Filariasis
Source: Hindawi journal article supplement (doi:10.1155/2022/7504871), 2022-12-28

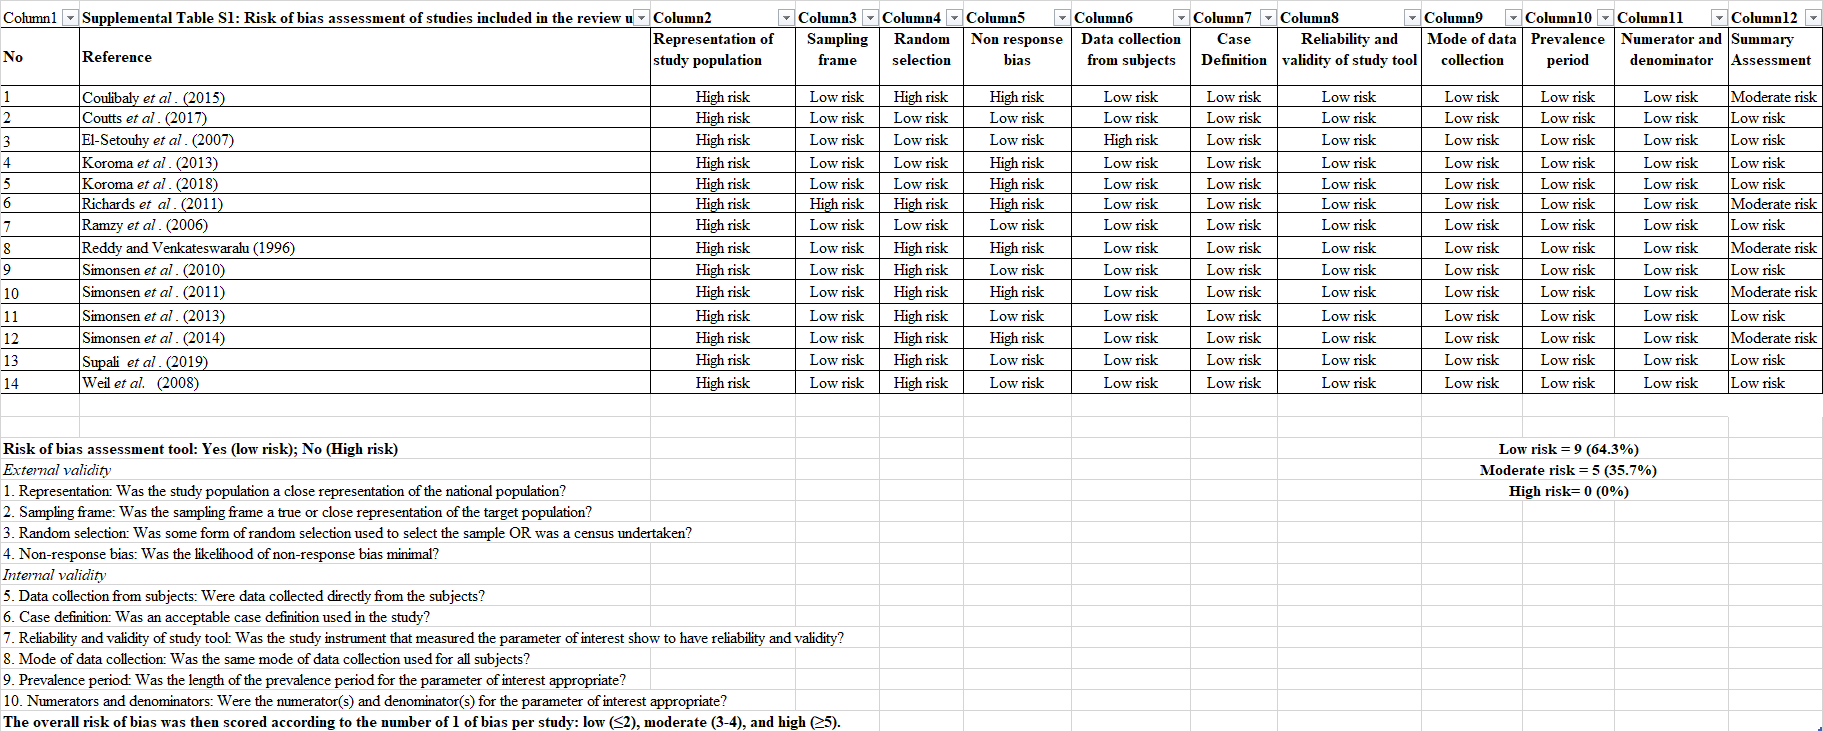

Supplement: f1 [file 7504871.f1.zip › Supplemental Table S1, I.F. Aboagye.docx]
